# Supplementary material for: Doping of the Mn vacancy of Mn2B2 with a single different transition metal atom as the dual-function electrocatalyst
Source: Royal Society of Chemistry journal article supplement (doi:10.1039/d2cp02209e), 2022-01-01
Supplement: d2cp02209e1.pdf [file d2cp02209e1.pdf]

## Supporting Information

### **Doping of the Mn vacancy of Mn<sub>2</sub>B<sub>2</sub> with a single different transition metal atom as the dual-function electrocatalyst**

Jing Xu<sup>a</sup>, Yusheng Wang<sup>\*a,c</sup>, Nahong Song<sup>b,c</sup>, Shijun Luo<sup>a</sup>, Bin Xu<sup>a</sup>, Jing  
Zhang<sup>a</sup>, Fei Wang<sup>c</sup>

<sup>a</sup> *College of Physics and Electronics, North China University of Water Resources  
and Electric Power, Zhengzhou, Henan, 450046, China*

<sup>b</sup> *College of Computer and Information Engineering, Henan University of Economics  
and Law, Zhengzhou, Henan, 450000, China*

<sup>c</sup> *International Laboratory for Quantum Functional Materials of Henan, School of  
Physics, Zhengzhou University, Zhengzhou 450001, China*

Corresponding author: wangyusheng@ncwu.edu.cn

# Figures

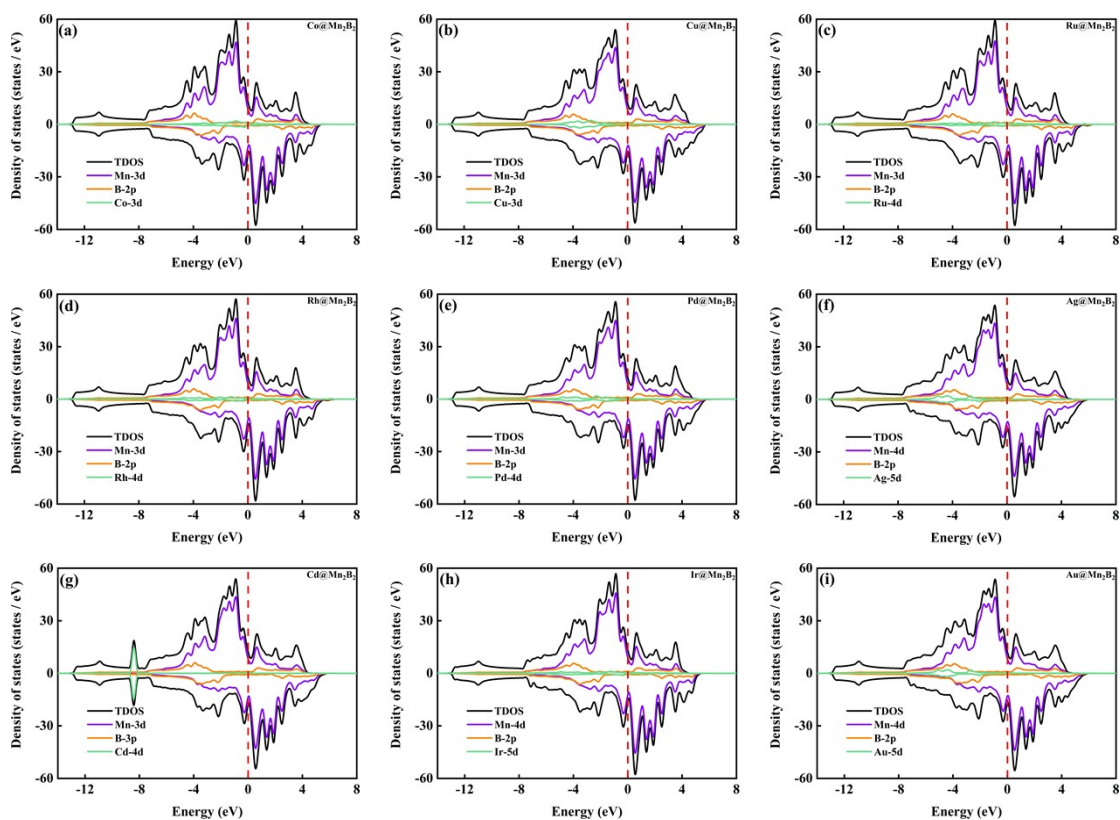

**Fig. S1** The total density of states (TDOS) and projected density of states (PDOS) for (a) Co@Mn<sub>2</sub>B<sub>2</sub>, (b) Cu@Mn<sub>2</sub>B<sub>2</sub>, (c) Ru@Mn<sub>2</sub>B<sub>2</sub>, (d) Rh@Mn<sub>2</sub>B<sub>2</sub>, (e) Pd@Mn<sub>2</sub>B<sub>2</sub>, (f) Ag@Mn<sub>2</sub>B<sub>2</sub>, (g) Cd@Mn<sub>2</sub>B<sub>2</sub>, (h) Ir@Mn<sub>2</sub>B<sub>2</sub> and (i) Au@Mn<sub>2</sub>B<sub>2</sub>, where the Fermi level was set to 0 eV.

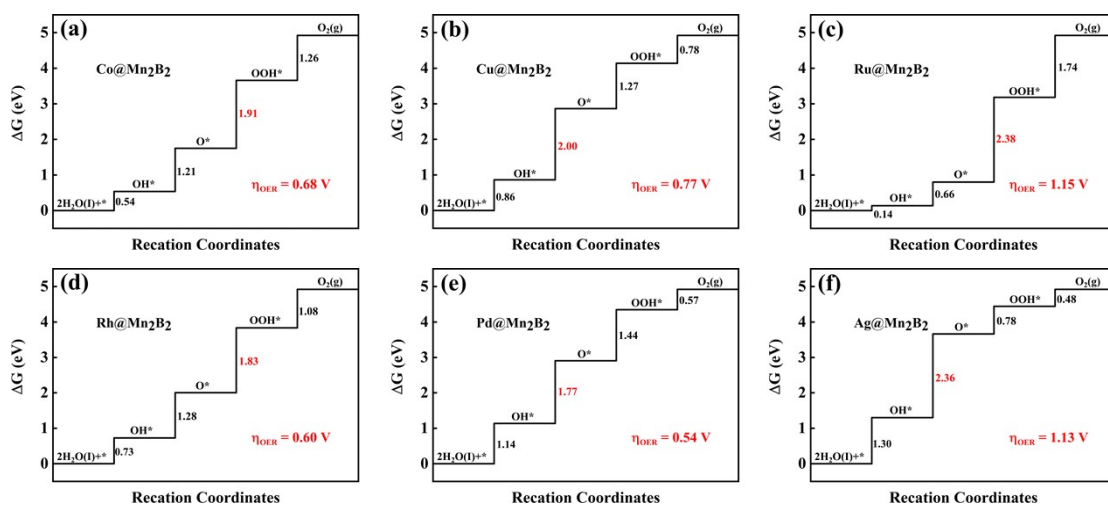

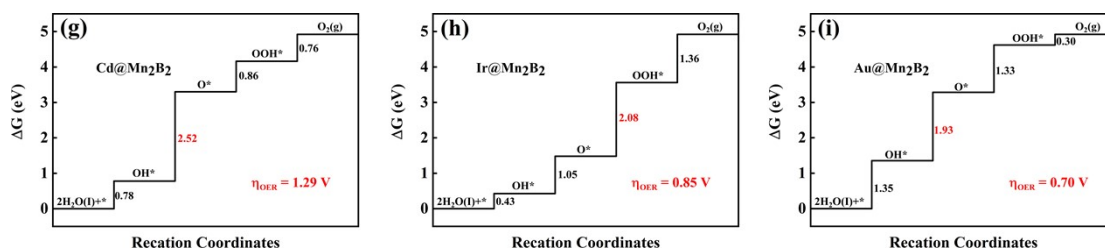

**Fig. S2** The Gibbs free energy diagrams for the OER pathway of (a) Co@Mn<sub>2</sub>B<sub>2</sub>, (b) Cu@Mn<sub>2</sub>B<sub>2</sub>, (c) Ru@Mn<sub>2</sub>B<sub>2</sub>, (d) Rh@Mn<sub>2</sub>B<sub>2</sub>, (e) Pd@Mn<sub>2</sub>B<sub>2</sub>, (f) Ag@Mn<sub>2</sub>B<sub>2</sub>, (g) Cd@Mn<sub>2</sub>B<sub>2</sub>, (h) Ir@Mn<sub>2</sub>B<sub>2</sub> and (i) Au@Mn<sub>2</sub>B<sub>2</sub> at an electrode potential of 0 V.

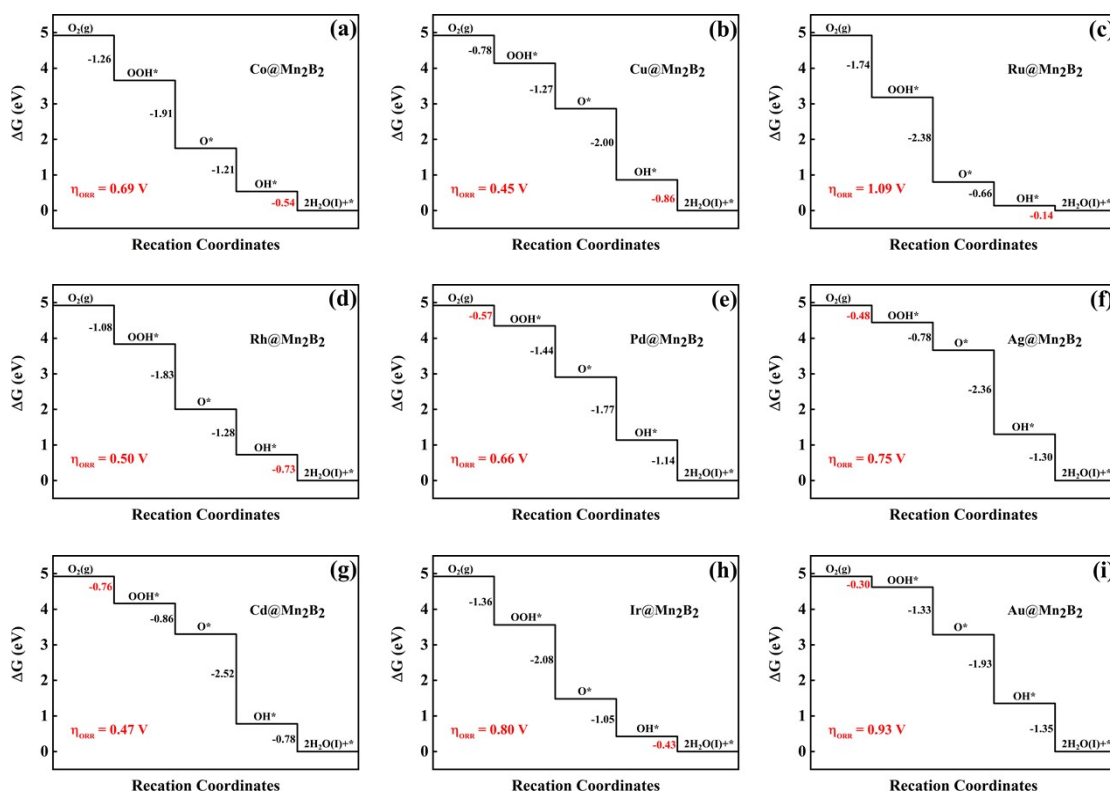

**Fig. S3** The Gibbs free energy diagrams for the ORR pathway of (a) Co@Mn<sub>2</sub>B<sub>2</sub>, (b) Cu@Mn<sub>2</sub>B<sub>2</sub>, (c) Ru@Mn<sub>2</sub>B<sub>2</sub>, (d) Rh@Mn<sub>2</sub>B<sub>2</sub>, (e) Pd@Mn<sub>2</sub>B<sub>2</sub>, (f) Ag@Mn<sub>2</sub>B<sub>2</sub>, (g) Cd@Mn<sub>2</sub>B<sub>2</sub>, (h) Ir@Mn<sub>2</sub>B<sub>2</sub> and (i) Au@Mn<sub>2</sub>B<sub>2</sub> at an electrode potential of 0 V.

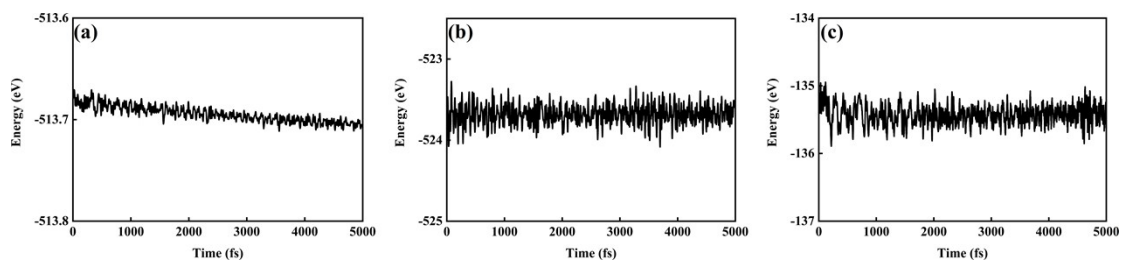

**Fig. S4** The evolution trends of the total energy of (a) a 4×4 supercell with an -OH adsorbed, (b) a 4×4 supercell with two -OH adsorbed and (c) a 2×2 supercell with an -OH adsorbed.

## Tables

**Table S1** The binding energy  $E_b$  (eV) of a single different transition metal atoms embedded in the Mn vacancies of  $\text{Mn}_2\text{B}_2$ .

| TM | $E_b/\text{eV}$ |
|----|-----------------|
| Co | -7.97           |
| Ni | -7.00           |
| Cu | -4.59           |
| Ru | -10.10          |
| Rh | -8.11           |
| Pd | -5.33           |
| Ag | -3.36           |
| Cd | -1.85           |
| Ir | -10.24          |
| Pt | -7.81           |
| Au | -4.17           |

**Table S2** The binding free energy ( $\Delta G_1$ ,  $\Delta G_2$ ,  $\Delta G_3$  and  $\Delta G_4$ ) and theoretical overpotential ( $\eta_{\text{OER}}$ ) of the OER for different transition metal atoms.

| TM@Mn <sub>2</sub> B <sub>2</sub> | $\Delta G_1/\text{eV}$ | $\Delta G_2/\text{eV}$ | $\Delta G_3/\text{eV}$ | $\Delta G_4/\text{eV}$ | $\eta_{\text{OER}}/\text{V}$ |
|-----------------------------------|------------------------|------------------------|------------------------|------------------------|------------------------------|
| Co@Mn <sub>2</sub> B <sub>2</sub> | 0.54                   | 1.21                   | 1.91                   | 1.26                   | 0.68                         |
| Ni@Mn <sub>2</sub> B <sub>2</sub> | 0.86                   | 1.53                   | 1.61                   | 0.91                   | 0.38                         |
| Cu@Mn <sub>2</sub> B <sub>2</sub> | 0.86                   | 2.00                   | 1.27                   | 0.78                   | 0.77                         |
| Ru@Mn <sub>2</sub> B <sub>2</sub> | 0.14                   | 0.66                   | 2.38                   | 1.74                   | 1.15                         |
| Rh@Mn <sub>2</sub> B <sub>2</sub> | 0.73                   | 1.28                   | 1.83                   | 1.08                   | 0.60                         |
| Pd@Mn <sub>2</sub> B <sub>2</sub> | 1.14                   | 1.77                   | 1.44                   | 0.57                   | 0.54                         |
| Ag@Mn <sub>2</sub> B <sub>2</sub> | 1.30                   | 2.36                   | 0.78                   | 0.48                   | 1.13                         |
| Cd@Mn <sub>2</sub> B <sub>2</sub> | 0.78                   | 2.52                   | 0.86                   | 0.76                   | 1.29                         |
| Ir@Mn <sub>2</sub> B <sub>2</sub> | 0.43                   | 1.05                   | 2.08                   | 1.36                   | 0.85                         |
| Pt@Mn <sub>2</sub> B <sub>2</sub> | 1.00                   | 1.52                   | 1.68                   | 0.71                   | 0.45                         |
| Au@Mn <sub>2</sub> B <sub>2</sub> | 1.35                   | 1.93                   | 1.33                   | 0.30                   | 0.70                         |

**Table S3** The binding free energy ( $\Delta G_a$ ,  $\Delta G_b$ ,  $\Delta G_c$  and  $\Delta G_d$ ) and theoretical overpotential ( $\eta_{\text{ORR}}$ ) of the ORR for different transition metal atoms.

| TM@Mn <sub>2</sub> B <sub>2</sub> | $\Delta G_a/\text{eV}$ | $\Delta G_b/\text{eV}$ | $\Delta G_c/\text{eV}$ | $\Delta G_d/\text{eV}$ | $\eta_{\text{ORR}}/\text{V}$ |
|-----------------------------------|------------------------|------------------------|------------------------|------------------------|------------------------------|
| Co@Mn <sub>2</sub> B <sub>2</sub> | -1.26                  | -1.91                  | -1.21                  | -0.54                  | 0.69                         |
| Ni@Mn <sub>2</sub> B <sub>2</sub> | -0.91                  | -1.61                  | -1.53                  | -0.86                  | 0.37                         |
| Cu@Mn <sub>2</sub> B <sub>2</sub> | -0.78                  | -1.27                  | -2.00                  | -0.86                  | 0.45                         |
| Ru@Mn <sub>2</sub> B <sub>2</sub> | -1.74                  | -2.38                  | -0.66                  | -0.14                  | 1.09                         |
| Rh@Mn <sub>2</sub> B <sub>2</sub> | -1.08                  | -1.83                  | -1.28                  | -0.73                  | 0.50                         |
| Pd@Mn <sub>2</sub> B <sub>2</sub> | -0.57                  | -1.44                  | -1.77                  | -1.14                  | 0.66                         |
| Ag@Mn <sub>2</sub> B <sub>2</sub> | -0.48                  | -0.78                  | -2.36                  | -1.30                  | 0.75                         |
| Cd@Mn <sub>2</sub> B <sub>2</sub> | -0.76                  | -0.86                  | -2.52                  | -0.78                  | 0.47                         |
| Ir@Mn <sub>2</sub> B <sub>2</sub> | -1.36                  | -2.08                  | -1.05                  | -0.43                  | 0.80                         |
| Pt@Mn <sub>2</sub> B <sub>2</sub> | -0.71                  | -1.68                  | -1.52                  | -1.00                  | 0.52                         |
| Au@Mn <sub>2</sub> B <sub>2</sub> | -0.30                  | -1.33                  | -1.93                  | -1.35                  | 0.93                         |

**Table S4** The adsorption energy  $E_a$  (eV) of OH\*, O\*, OOH\* and H\* for different doped transition metal atoms.

| TM@Mn <sub>2</sub> B <sub>2</sub> | $E_a(\text{OH}^*)/\text{eV}$ | $E_a(\text{O}^*)/\text{eV}$ | $E_a(\text{OOH}^*)/\text{eV}$ | $E_a(\text{H}^*)/\text{eV}$ |
|-----------------------------------|------------------------------|-----------------------------|-------------------------------|-----------------------------|
| Co@Mn <sub>2</sub> B <sub>2</sub> | -3.45                        | -5.59                       | -2.18                         | -3.56                       |
| Ni@Mn <sub>2</sub> B <sub>2</sub> | -3.13                        | -4.95                       | -1.78                         | -3.22                       |
| Cu@Mn <sub>2</sub> B <sub>2</sub> | -3.09                        | -4.45                       | -1.69                         | -2.92                       |
| Ru@Mn <sub>2</sub> B <sub>2</sub> | -3.84                        | -6.55                       | -2.58                         | -3.83                       |
| Rh@Mn <sub>2</sub> B <sub>2</sub> | -3.27                        | -5.34                       | -1.98                         | -3.59                       |
| Pd@Mn <sub>2</sub> B <sub>2</sub> | -2.81                        | -4.40                       | -1.45                         | -3.19                       |
| Ag@Mn <sub>2</sub> B <sub>2</sub> | -2.68                        | -3.66                       | -1.38                         | -2.72                       |
| Cd@Mn <sub>2</sub> B <sub>2</sub> | -3.18                        | -4.03                       | -1.64                         | -2.90                       |
| Ir@Mn <sub>2</sub> B <sub>2</sub> | -3.54                        | -5.87                       | -2.24                         | -4.07                       |
| Pt@Mn <sub>2</sub> B <sub>2</sub> | -2.98                        | -4.81                       | -1.59                         | -3.70                       |
| Au@Mn <sub>2</sub> B <sub>2</sub> | -2.64                        | -4.05                       | -1.20                         | -3.26                       |



**Table S5** The  $d$ -band centers ( $\varepsilon_d$ ) of TM@Mn<sub>2</sub>B<sub>2</sub>.

| TM@Mn <sub>2</sub> B <sub>2</sub> | $\varepsilon_d$ (eV) |
|-----------------------------------|----------------------|
| Co@Mn <sub>2</sub> B <sub>2</sub> | -1.40                |
| Ni@Mn <sub>2</sub> B <sub>2</sub> | -1.82                |
| Cu@Mn <sub>2</sub> B <sub>2</sub> | -3.01                |
| Ru@Mn <sub>2</sub> B <sub>2</sub> | -1.81                |
| Rh@Mn <sub>2</sub> B <sub>2</sub> | -2.23                |
| Pd@Mn <sub>2</sub> B <sub>2</sub> | -2.80                |
| Ag@Mn <sub>2</sub> B <sub>2</sub> | -3.93                |
| Cd@Mn <sub>2</sub> B <sub>2</sub> | -8.20                |
| Ir@Mn <sub>2</sub> B <sub>2</sub> | -2.74                |
| Pt@Mn <sub>2</sub> B <sub>2</sub> | -3.37                |
| Au@Mn <sub>2</sub> B <sub>2</sub> | -3.77                |

**Table S6** The binding free energy  $\Delta G_{\text{H}}$  (eV) of the HER for different transition metal atoms.

| TM@Mn <sub>2</sub> B <sub>2</sub> | $\Delta G_{\text{H}}/\text{eV}$ |
|-----------------------------------|---------------------------------|
| Co@Mn <sub>2</sub> B <sub>2</sub> | -0.05                           |
| Ni@Mn <sub>2</sub> B <sub>2</sub> | 0.25                            |
| Cu@Mn <sub>2</sub> B <sub>2</sub> | 0.56                            |
| Ru@Mn <sub>2</sub> B <sub>2</sub> | -0.32                           |
| Rh@Mn <sub>2</sub> B <sub>2</sub> | -0.08                           |
| Pd@Mn <sub>2</sub> B <sub>2</sub> | 0.31                            |
| Ag@Mn <sub>2</sub> B <sub>2</sub> | 0.75                            |
| Cd@Mn <sub>2</sub> B <sub>2</sub> | 0.57                            |
| Ir@Mn <sub>2</sub> B <sub>2</sub> | -0.53                           |
| Pt@Mn <sub>2</sub> B <sub>2</sub> | -0.16                           |
| Au@Mn <sub>2</sub> B <sub>2</sub> | 0.24                            |

**Table S7** The binding free energy ( $\Delta G_1$ ,  $\Delta G_2$ ,  $\Delta G_3$  and  $\Delta G_4$ ) and theoretical overpotential ( $\eta_{\text{OER}}$ ) of the OER for a single Mn atom of  $\text{Mn}_2\text{B}_2$ .

|                         | $\Delta G_1/\text{eV}$ | $\Delta G_2/\text{eV}$ | $\Delta G_3/\text{eV}$ | $\Delta G_4/\text{eV}$ | $\eta_{\text{OER}}/\text{V}$ |
|-------------------------|------------------------|------------------------|------------------------|------------------------|------------------------------|
| $\text{Mn}_2\text{B}_2$ | -0.21                  | 0.49                   | 2.58                   | 2.06                   | 1.35                         |

**Table S8** The binding free energy ( $\Delta G_a$ ,  $\Delta G_b$ ,  $\Delta G_c$  and  $\Delta G_d$ ) and theoretical overpotential ( $\eta_{\text{ORR}}$ ) of the ORR for a single Mn atom of  $\text{Mn}_2\text{B}_2$ .

|                         | $\Delta G_a/\text{eV}$ | $\Delta G_b/\text{eV}$ | $\Delta G_c/\text{eV}$ | $\Delta G_d/\text{eV}$ | $\eta_{\text{ORR}}/\text{V}$ |
|-------------------------|------------------------|------------------------|------------------------|------------------------|------------------------------|
| $\text{Mn}_2\text{B}_2$ | -2.06                  | -2.58                  | -0.49                  | 0.21                   | 1.44                         |

**Table S9** The adsorption energy  $E_a$  (eV) of  $\text{OH}^*$ ,  $\text{O}^*$ ,  $\text{OOH}^*$  and  $\text{H}^*$  for a single Mn atom of  $\text{Mn}_2\text{B}_2$ .

|                         | $E_a(\text{OH}^*)/\text{eV}$ | $E_a(\text{O}^*)/\text{eV}$ | $E_a(\text{OOH}^*)/\text{eV}$ | $E_a(\text{H}^*)/\text{eV}$ |
|-------------------------|------------------------------|-----------------------------|-------------------------------|-----------------------------|
| $\text{Mn}_2\text{B}_2$ | -4.17                        | -7.07                       | -2.96                         | -3.47                       |

**Table S10** The binding free energy ( $\Delta G_1/\Delta G_a$ ,  $\Delta G_2/\Delta G_b$ ,  $\Delta G_3/\Delta G_c$  and  $\Delta G_4/\Delta G_d$ ) and theoretical overpotential ( $\eta_{\text{OER}}/\eta_{\text{ORR}}$ ) of the Ni@Mn<sub>2</sub>B<sub>2</sub> without DFT-D2 vdw correction.

| TM@Mn <sub>2</sub> B <sub>2</sub> | $\Delta G_1/\Delta G_a$ | $\Delta G_2/\Delta G_b$ | $\Delta G_3/\Delta G_c$ | $\Delta G_4/\Delta G_d$ | $\eta_{\text{OER}}/\eta_{\text{ORR}}$ |
|-----------------------------------|-------------------------|-------------------------|-------------------------|-------------------------|---------------------------------------|
| Ni@Mn <sub>2</sub> B <sub>2</sub> | 1.04/-0.87              | 1.40/-1.61              | 1.61/-1.40              | 0.87/-1.04              | 0.38/0.36                             |

**Table S11** The binding energy  $E_b$  (eV), theoretical overpotential ( $\eta_{\text{OER}}$ ) of the OER, theoretical overpotential ( $\eta_{\text{ORR}}$ ) of the ORR and the binding free energy  $\Delta G_{\text{H}}$  (eV) of the HER.

| TM@Mn <sub>2</sub> B <sub>2</sub> | $E_b/\text{eV}$ | $\eta_{\text{OER}}/\text{V}$ | $\eta_{\text{ORR}}/\text{V}$ | $\Delta G_{\text{H}}/\text{eV}$ |
|-----------------------------------|-----------------|------------------------------|------------------------------|---------------------------------|
| Ir                                | -10.24          | 0.85                         | 0.8                          | -0.53                           |
| Ru                                | -10.1           | 1.15                         | 1.09                         | -0.32                           |
| Rh                                | -8.11           | 0.6                          | 0.5                          | -0.08                           |
| Co                                | -7.97           | 0.68                         | 0.69                         | -0.05                           |
| Pt                                | -7.81           | 0.45                         | 0.52                         | -0.16                           |
| Ni                                | -7              | 0.38                         | 0.37                         | 0.25                            |
| Pd                                | -5.33           | 0.54                         | 0.66                         | 0.31                            |
| Cu                                | -4.59           | 0.77                         | 0.45                         | 0.56                            |
| Au                                | -4.17           | 0.7                          | 0.93                         | 0.24                            |
| Ag                                | -3.36           | 1.13                         | 0.75                         | 0.75                            |
| Cd                                | -1.85           | 1.29                         | 0.47                         | 0.57                            |

**Hydrogen coverage:**

we used fifteen Mn atoms generated from one surface of the 4×4 supercell and a single metal atom replacing Mn as the active site of the HER intermediate H<sup>+</sup> (total sixteen adsorption sites). For example, 1/4 of the coverage stated in the manuscript is four H<sup>+</sup> adsorbed at four different sites. The number of adsorption structures formed due to the arrangement and combination of fifteen Mn atoms with a single metal atom are high, so we selected the other three positions closest to the single metal atom. The results for the 1/4 hydrogen coverage are still calculated based on the 1/16 hydrogen coverage calculation method, except that one H<sup>+</sup> is replaced by four H<sup>+</sup>.
